# Supplementary material for: A colorimetric and fluorescent pH probe for imaging in E. coli cells
Source: Royal Society of Chemistry journal article supplement (doi:10.1039/c6ra24885c), 2017-01-01
Supplement: c6ra24885c1.pdf [file c6ra24885c1.pdf]

## Supporting Information

### A colorimetric and fluorescent pH probe for imaging in *E. coli* cells

Jianbin Chao,<sup>a\*</sup> Kailun Song,<sup>ab</sup> Huijuan Wang,<sup>ab</sup> Zhiqing Li,<sup>ab</sup> Yongbin Zhang,<sup>d</sup>

Caixia Yin,<sup>c</sup> Fangjun Huo,<sup>d</sup> Juanjuan Wang,<sup>a</sup> Ting Zhang<sup>a</sup>

<sup>a</sup>Scientific Instrument Center, Shanxi University, Taiyuan 030006, China

<sup>b</sup>School of Chemistry and Chemical Engineering, Shanxi University, Taiyuan 030006, China

<sup>c</sup>Institute of Molecular Science, Shanxi University, Taiyuan 030006, China

<sup>d</sup>Research Institute of Applied Chemistry, Shanxi University, Taiyuan 030006, China

Supplementary Figures.

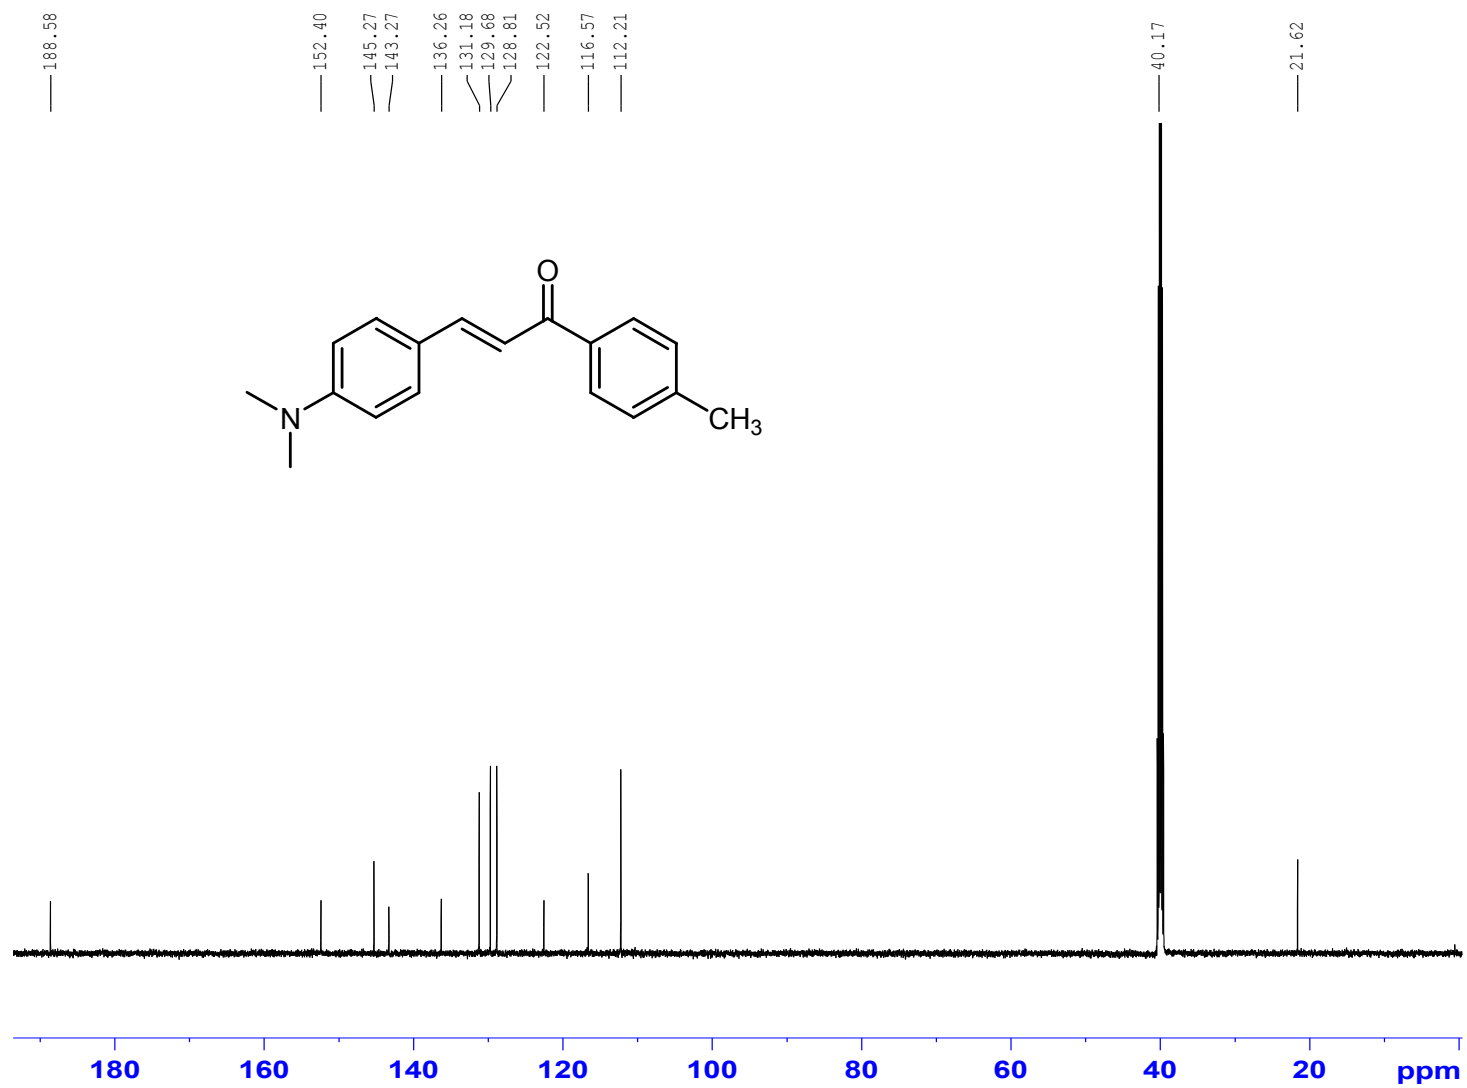

Figure S1. <sup>13</sup>C NMR of MDAK.

C2-3 #32-70 RT: 0.16-0.23 AV: 3 NL: 2.78E9  
T: FTMS + p ESI Full ms [150.00-2000.00]

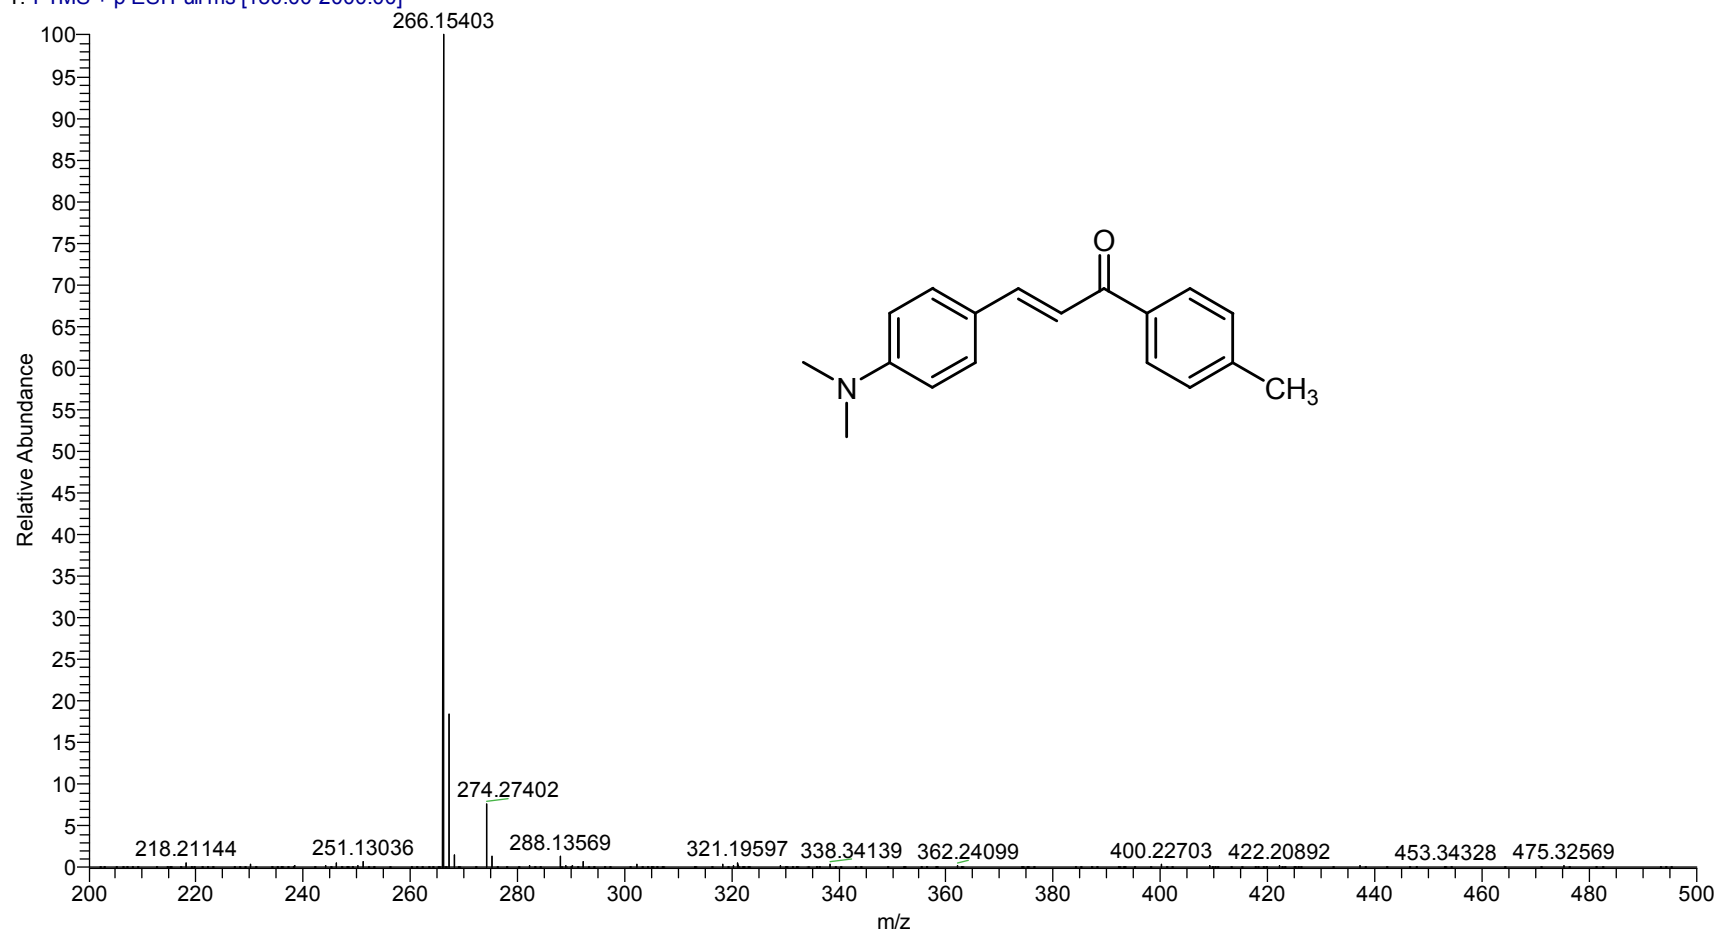

Figure S2. ESIMS analysis of **MDAK**.
